# Supplementary material for: The photocatalytic properties of ultrathin bismuth oxychloride nanosheets: a first principles study
Source: Royal Society of Chemistry journal article supplement (doi:10.1039/c5cp07437a), 2016-01-01

## Supporting Information

**Figure S1** The O atom layer-resolved PDOS of the defect free (a) and one Bi vacancy contained (b) BiOCl nanosheet.

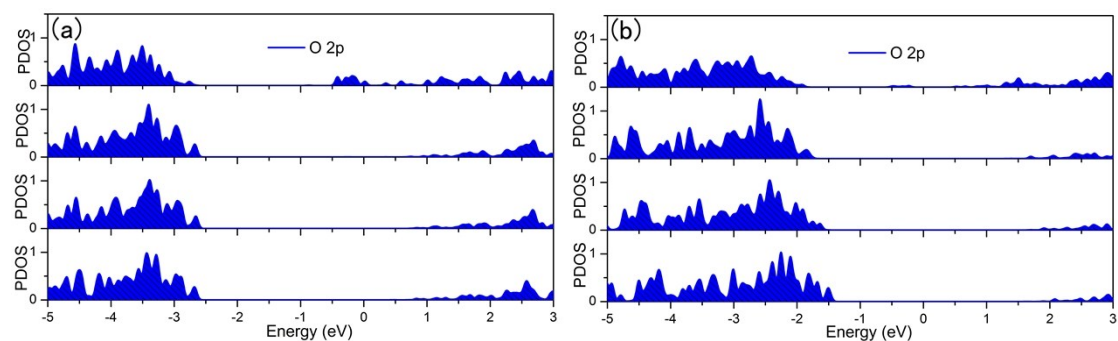

**Figure S2** The Cl atom layer-resolved PDOS of the defect free (a) and one Bi vacancy contained (b) BiOCl nanosheet.

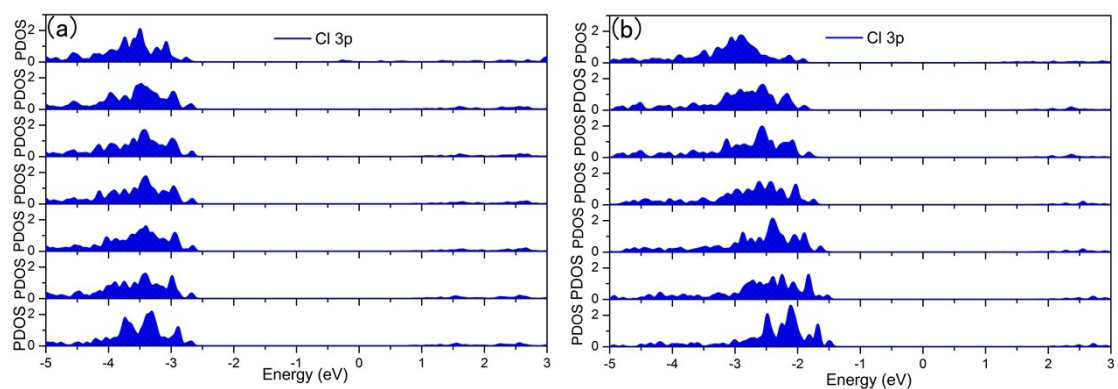

Supplement: c5cp07437a1.pdf [file c5cp07437a1.pdf]
